# Supplementary figures and images for: Purification and activity evaluation of novel anti-inflammatory peptides from pearl oyster (Pinctada martensii) hydrolysates
Source: Royal Society of Chemistry journal article supplement (doi:10.1039/d2fo04046h), 2023-01-01

163477 P 9 (0.166)

Scan ES+

403.44

1.70e7

100  
[M+H]<sup>+</sup>

%

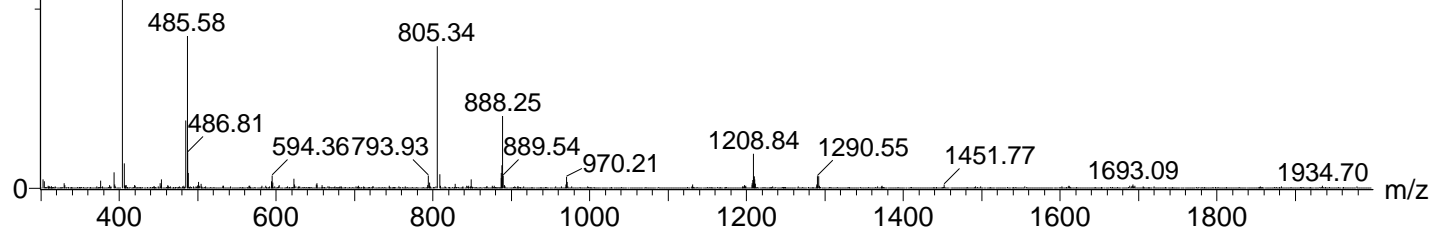

Supplement: d2fo04046h2.zip [file d2fo04046h2.zip]

163479 P 3 (0.055)

Scan ES+  
1.72e8

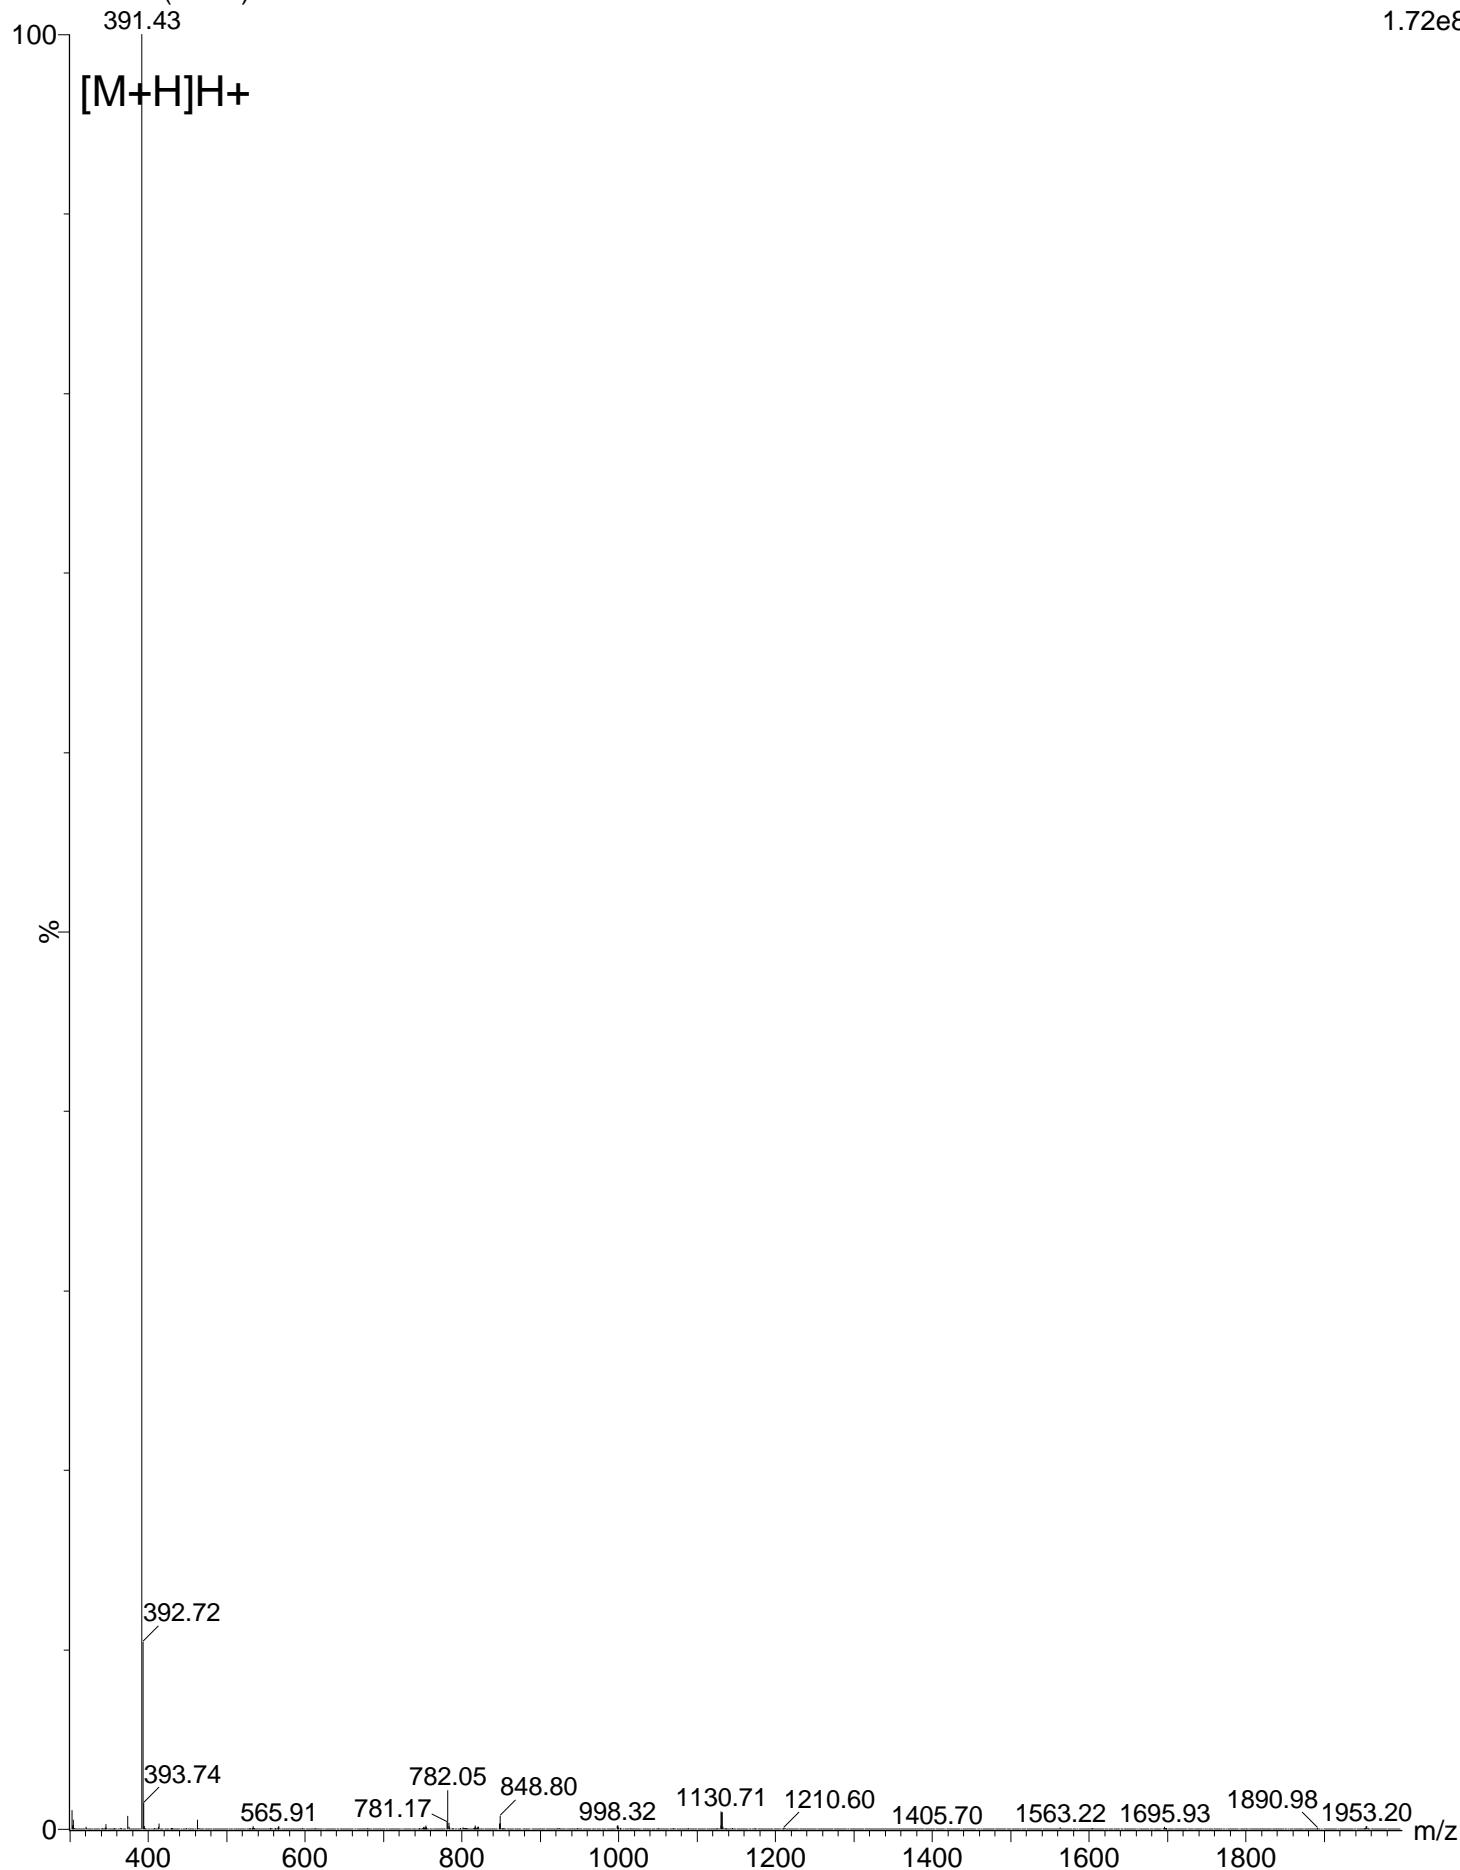

Supplement: d2fo04046h2.zip [file d2fo04046h2.zip]

163478 P 3 (0.055)

Scan ES+

4.33e7

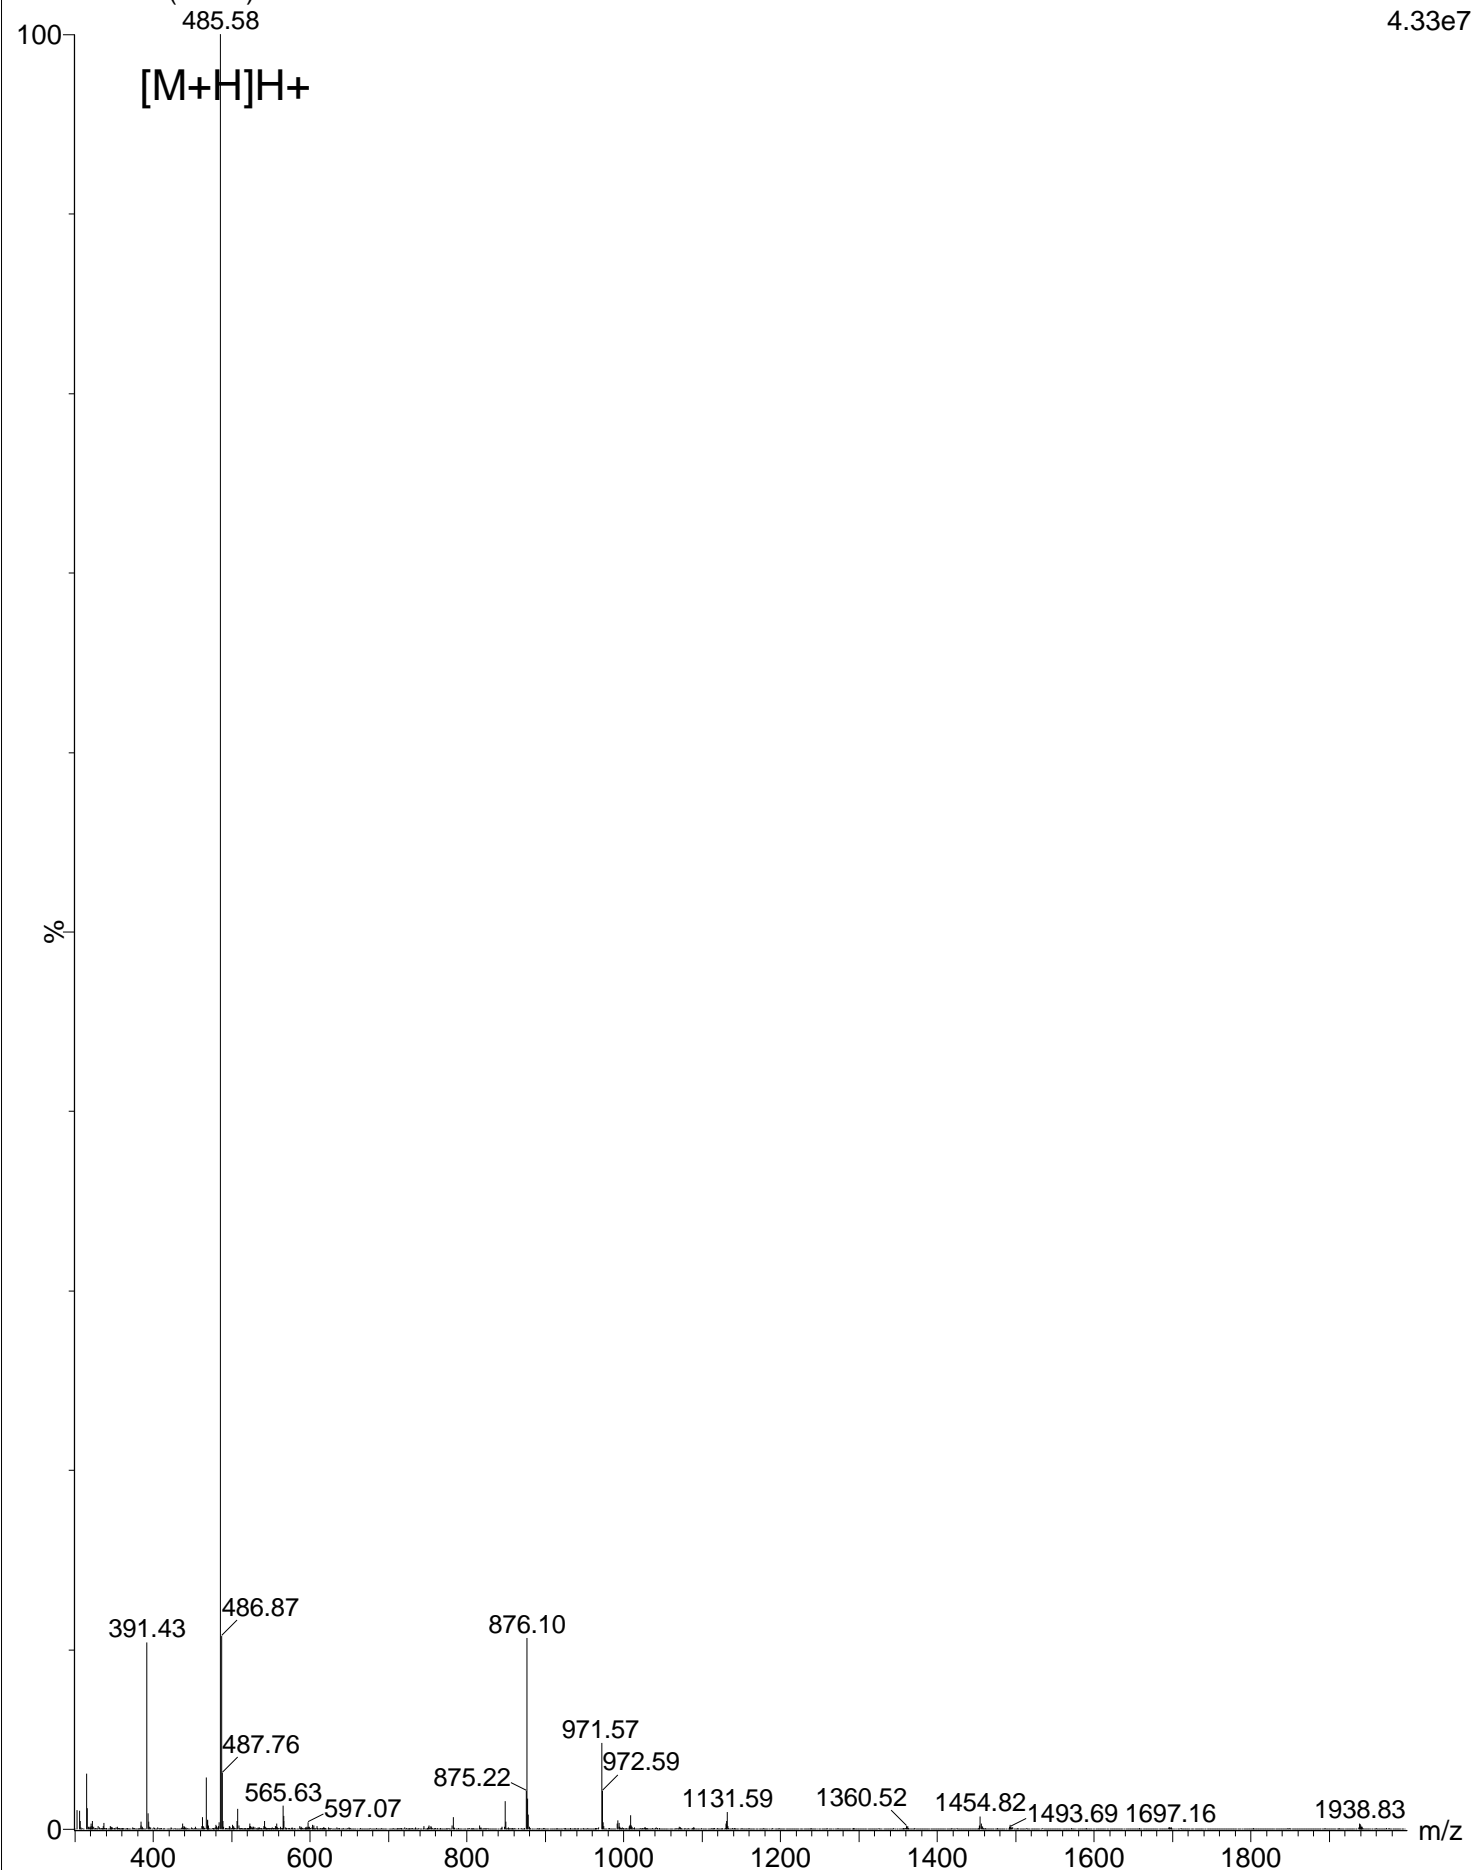

Supplement: d2fo04046h2.zip [file d2fo04046h2.zip]
